# Supplementary material for: Revisiting Genetic Epidemiology with a Refined Targeted Gene Panel for Hereditary Hearing Impairment in the Taiwanese Population
Source: MDPI journal article supplement (doi:10.3390/genes14040880), 2023-04-07
Supplement: s1 [file s1]

**Table S1.** NCBI reference sequences of the 30-gene panel.

|                                   | NCBI Reference Sequence     |
|-----------------------------------|-----------------------------|
| <i>AIFM1</i>                      | NM_004208 / NP_004199       |
| <i>DIAPH3</i>                     | NM_001042517 / NP_001035982 |
| <i>EDN3</i>                       | NM_000114 / NP_996917       |
| <i>EDNRB</i>                      | NM_001201397 / NP_001188326 |
| <i>EYA1</i>                       | NM_000503 / NP_000494       |
| <i>FOXI1</i>                      | NM_012188 / NP_036320       |
| <i>GJA1</i>                       | NM_000165 / NP_000156       |
| <i>GJB1</i>                       | NM_001097642 / NP_001091111 |
| <i>GJB2</i>                       | NM_004004 / NP_003995       |
| <i>GJB3</i>                       | NM_024009 / NP_076872       |
| <i>GJB4</i>                       | NM_153212 / NP_694944       |
| <i>GJB6</i>                       | NM_006783 / NP_006774       |
| <i>KCNJ10</i>                     | NM_002241 / NP_002232       |
| <i>KCNQ4</i>                      | NM_004700 / NP_004691       |
| <i>MITF</i>                       | NM_198159 / NP_001171896    |
| <i>Continued on the next page</i> |                             |

**Table S1 (con't).** NCBI reference sequences of the 30-gene panel.

|                         | NCBI Reference Sequence     |
|-------------------------|-----------------------------|
| <i>MYO15A</i>           | NM_016239 / NP_057323       |
| <i>OTOF</i>             | NM_004802 / NP_004793       |
| <i>PAX3</i>             | NM_181459 / NP_852124       |
| <i>PCDH9</i>            | NM_203487 / NP_982354       |
| <i>POU3F4</i>           | NM_000307 / NP_000298       |
| <i>POU4F3</i>           | NM_002700 / NP_002691       |
| <i>PJVK</i>             | NM_001042702 / NP_001036167 |
| <i>SIX1</i>             | NM_005982 / NP_005973       |
| <i>SIX5</i>             | NM_175875 / NP_787071       |
| <i>SLC26A4</i>          | NM_000441 / NP_000432       |
| <i>SNAI2</i>            | NM_003068 / NP_003059       |
| <i>SOX10</i>            | NM_006941 / NP_008872       |
| <i>STRC</i>             | NM_153700 / NP_714544       |
| <i>MT-RNR1 / MT-TL1</i> | NC_012920                   |

**Table S2.** Causative variants of the relevant genes (GJB2).

| Gene        | Variants                                         | Number of<br>Patients |
|-------------|--------------------------------------------------|-----------------------|
| <i>GJB2</i> | c.109G>A (p.V37I)/ c.109G>A (p.V37I)             | 89                    |
|             | c.109G>A (p.V37I)/c.235delC (p.L79Cfs *3)        | 6                     |
|             | c.235delC (p.L79Cfs *3)/ c.235delC (p.L79Cfs *3) | 5                     |
|             | c.109G>A (p.V37I)/c.101T>C (p.M34T)              | 1                     |
|             | c.109G>A (p.V37I)/c.283G>A (p.V95M)              | 1                     |
|             | c.109G>A (p.V37I)/c.571T>C (p.F191L)             | 1                     |
|             | c.109G>A (p.V37I)/c.609C>G (p.I203M)             | 1                     |
|             | c.109G>A (p.V37I)/c.494G>A (p.R165Q)             | 1                     |
|             | c.235delC (p.L79Cfs *3)/c.35dup (p.V13fs)        | 1                     |
|             | c.223C>T (p.R75W)                                | 1                     |
|             | c.508_511dupAACG (p.A171Qfs *40)                 | 1                     |

**Table S3.** Causative variants of the relevant genes (SLC26A4 and OTOF).

| Gene           | Variants                                     | Number of Patients |
|----------------|----------------------------------------------|--------------------|
| <i>SLC26A4</i> | c.919-2A>G/ c.919-2A>G                       | 15                 |
|                | c.919-2A>G/c.1975G>C (p.V659L)               | 3                  |
|                | c.919-2A>G/c.2168A>G (p.H723R)               | 2                  |
|                | c.919-2A>G/c.1160C>T (p.A387V)               | 1                  |
|                | c.919-2A>G/c.1174A>T (p.N392Y)               | 1                  |
|                | c.919-2A>G/c.1225C>T (p.R409C)               | 1                  |
|                | c.919-2A>G/c.1229C>T (p.T410M)               | 1                  |
|                | c.919-2A>G/c.1271G>A(p.G424D)                | 1                  |
|                | c.919-2A>G/c.1716T>A (p.F572L)               | 1                  |
|                | c.919-2A>G/c.1786C>T (p.Q596Ter)             | 1                  |
|                | c.919-2A>G/c.751_752delCTinsTC (p.Leu251Ser) | 1                  |
| <i>OTOF</i>    | c.1262A>C (p.Q421P)/c.1707+5G>A              | 1                  |
|                | c.5098G>C (p.E1700Q)/ c.5098G>C (p.E1700Q)   | 3                  |
|                | c.5098G>C (p.E1700Q)/c.5975A>G (p.K1992R)    | 4                  |

**Table S4.** Causative variants of the relevant genes (MYO15A).

| Gene          | Variants                                                          | Number of Patients |
|---------------|-------------------------------------------------------------------|--------------------|
| <i>MYO15A</i> | c.3524dup (p.S1176fs)/ c.3524dup (p.S1176fs)                      | 2                  |
|               | c.3524dup (p.S1176fs)/c. 8828dupT (p.S2945Ffs*55)                 | 1                  |
|               | c.3524dup (p.S1176fs)/c.10250_10252delCCT (p.S3417del)            | 1                  |
|               | c.3524dup (p.S1176fs)/c.3757-32_3757-1del                         | 1                  |
|               | c.3524dup (p.S1176fs)/c.6863C>T (p.S2288L)                        | 1                  |
|               | c.3524dup (p.S1176fs)/c.6956+1G>A                                 | 1                  |
|               | c.3524dup (p.S1176fs)/c.7708_7709insCA (p.Q2571Hfs*35)            | 1                  |
|               | c.3742C>T (p.R1248W)/c.4304A>C (p.Y1435S)                         | 1                  |
|               | c.3926A>T (p.Q1309L)/c.10250_10252delCCT (p.S3417del)             | 1                  |
|               | c.4642G>A (p.A1298T)/c.3958G>A (p.G1320S)                         | 1                  |
|               | c.7711_7712dupCA (p.Gln2571HisfsTer35)/c. 8340+5G>A               | 1                  |
|               | c.10250_10252delCCT (p.S3417del)/c.10258_10260delTTC (p.F3420del) | 1                  |
